# Supplementary material for: Mice deficient in NKLAM have attenuated inflammatory cytokine production in a Sendai virus pneumonia model
Source: PubMed Central journal article supplement (PMC6754162; doi:10.1371/journal.pone.0222802), 2019-09-20
Supplement: pone.0222802.s002.pdf [file pone.0222802.s002.pdf]

### Day 3

| <u>Cytokine:</u> | <u>WT</u> | <u>NKLAM<sup>-/-</sup></u> | <u>fold</u> |
|------------------|-----------|----------------------------|-------------|
| CXCL16           | 44473     | 36662                      | 1.2         |
| L-selectin       | 77170     | 65507                      | 1.2         |
| MCP-5            | 11894     | 10755                      | 1.1         |
| IGFBP-3          | 32544     | 28856                      | 1.1         |
| LIX              | 170135    | 160639                     | 1.1         |
| P-selectin       | 35386     | 35501                      | 1.0         |
| Eotaxin-2        | 8307      | 8509                       | 1.0         |
| TARC             | 21272     | 21298                      | 1.0         |
| TNFR1I           | 28586     | 31801                      | 0.9         |
| fractalkine      | 34985     | 43867                      | 0.8         |
| MIP1g            | 113866    | 137736                     | 0.8         |
| TNFR1            | 114851    | 147605                     | 0.8         |
| IGFBP-6          | 30407     | 42806                      | 0.7         |
| CD40             | 6438      | 8846                       | 0.7         |
| VCAM-1           | 57522     | 85128                      | 0.7         |
| IL-4             | 21098     | 27345                      | 0.8         |
| CD30             | n.d.      | n.d.                       | -           |

### Day 7

| <u>Cytokine:</u> | <u>WT</u> | <u>NKLAM<sup>-/-</sup></u> | <u>fold</u> |
|------------------|-----------|----------------------------|-------------|
| TARC             | 49733     | 38736                      | 1.3         |
| TNFR1I           | 85467     | 69941                      | 1.2         |
| CXCL16           | 45493     | 39451                      | 1.2         |
| TIMP-1           | 21305     | 19039                      | 1.1         |
| TNF $\alpha$     | 18981     | 16652                      | 1.1         |
| MIP1g            | 276926    | 250696                     | 1.1         |
| IL-4             | 20912     | 20709                      | 1.0         |
| MIP3a            | 28497     | 29648                      | 1.0         |
| leptin R         | 34784     | 34902                      | 1.0         |
| IGFBP-3          | 55817     | 56212                      | 1.0         |
| L-selectin       | 108593    | 109273                     | 1.0         |
| TNFR1            | 247894    | 264430                     | 0.9         |
| P-selectin       | 45873     | 51050                      | 0.9         |
| LIX              | 195140    | 223512                     | 0.9         |
| fractalkine      | 38418     | 50044                      | 0.8         |
| VEGF-a           | 8586      | 12503                      | 0.7         |
| VCAM-1           | 99661     | 136289                     | 0.7         |
| CD30             | n.d.      | n.d.                       | -           |
| MIG              | n.d.      | n.d.                       | -           |
