# Supplementary material for: Mice deficient in NKLAM have attenuated inflammatory cytokine production in a Sendai virus pneumonia model
Source: PubMed Central journal article supplement (PMC6754162; doi:10.1371/journal.pone.0222802), 2019-09-20
Supplement: pone.0222802.s003.pdf [file pone.0222802.s003.pdf]

### Day 3

| <u>Cytokine:</u> | <u>WT</u> | <u>NKLAM<sup>-/-</sup></u> | <u>fold</u> |
|------------------|-----------|----------------------------|-------------|
| TARC             | 865       | 8536                       | 9.9         |
| VEGF-a           | 2036      | 13408                      | 6.6         |
| lymphotactin     | 2945      | 11462                      | 3.9         |
| IGFBP-5          | 2048      | 6366                       | 3.1         |
| PF-4             | 17236     | 44855                      | 2.6         |
| leptin R         | 12662     | 28672                      | 2.3         |
| TPO              | 14841     | 25079                      | 1.7         |
| TIMP-1           | 7832      | 12709                      | 1.6         |
| IL-12 p70        | 9564      | 15798                      | 1.7         |
| M-CSF            | 11192     | 18323                      | 1.6         |
| MIP3a            | 13349     | 21080                      | 1.6         |
| IL-1b            | n.d.      | 5824                       | -           |
| TNFa             | n.d.      | 10839                      | -           |
| MIP3b            | n.d.      | 4077                       | -           |
| Fas ligand       | n.d.      | 3639                       | -           |
| MIG              | n.d.      | 808                        | -           |

### Day 7

| <u>Cytokine:</u> | <u>WT</u> | <u>NKLAM<sup>-/-</sup></u> | <u>fold</u> |
|------------------|-----------|----------------------------|-------------|
| IL-12 p70        | 698       | 6087                       | 8.7         |
| Fas ligand       | 570       | 2360                       | 4.1         |
| M-CSF            | 4488      | 17670                      | 3.9         |
| lymphotactin     | 1592      | 5484                       | 3.4         |
| IL-1b            | 1633      | 4069                       | 2.5         |
| Eotaxin-2        | 4895      | 11926                      | 2.4         |
| MCP-5            | 3627      | 8084                       | 2.2         |
| TPO              | 15576     | 32283                      | 2.1         |
| IGFBP-6          | 23951     | 49575                      | 2.1         |
| CD40             | 7155      | 11779                      | 1.6         |
| MIP3b            | n.d.      | 1746                       | -           |
| IGFBP-5          | n.d.      | 13394                      | -           |
| PF-4             | n.d.      | 40059                      | -           |
| TARC             | n.d.      | 5672                       | -           |
